# Supplementary material for: Rapid morphological change in black rats (Rattus rattus) after an island introduction
Source: PeerJ. 2015 Mar 3;3:e812. doi: 10.7717/peerj.812 (PMC4358651; doi:10.7717/peerj.812)
Supplement: Supplemental Information 1 — Measurements of 11 cranial and 4 external traits. [file peerj-03-812-s001.xlsx]

## Sheet: Sheet1
ISLAND	GEN	SP	MUS	SEX	MUSNUM	TOT	TAIL	HF	EAR	YEAR	ONL	BR	ZB	GL	IB	BB	LPN	LBC	LIF	AL	DBC
ANACAPA	Rattus	rattus	NHMLAC	F	7412	331	178	34	22	1940	13.0978	5.99333	17.8133	36.9311	5.33222	14.3267	21.6467	26.1422	6.66556	6.29222	12.94
ANACAPA	Rattus	rattus	NHMLAC	F	7413	446	239	38	26	1940	16.9822	7.49667	21.8611	45.2211	5.96778	16.6889	26.6367	32.0367	7.95556	6.59667	14.9856
ANACAPA	Rattus	rattus	NHMLAC	F	7420	347	198	35	25	1940	13.6033	6.17	19.6144	38.0344	5.71889	15.2189	21.7222	27.5044	6.61889	6.44222	13.7644
ANACAPA	Rattus	rattus	NHMLAC	F	7423	370	207	37	23	1940	14.9333	6.73	19.5028	39.9433	5.71333	15.2689	23.2244	28.5044	7.08222	6.43778	13.4056
ANACAPA	Rattus	rattus	NHMLAC	M	7411	349	185	35	24	1940	13.1144	6.04333	18.5244	37.2156	5.51	14.71	21.2711	26.8278	6.47667	6.12	13.2622
ANACAPA	Rattus	rattus	NHMLAC	M	7417	310	173	34	24	1940	13.2278	6.21		36.8367			21.0217	26.6556		6.26222	12.645
ANACAPA	Rattus	rattus	NHMLAC	M	7418	278	149	32	22	1940	10.9022	5.31667	16.0256	32.4356	5.17778	13.8589	18.2544	23.6267	5.59222	6.05556	12.4478
ANACAPA	Rattus	rattus	NHMLAC	M	7419	260	143	31	22	1940	10.9244	5.23	16.8711	32.7733	5.41222	14.3511	18.2589	24.0367	5.64889	6.12444	12.3989
ANACAPA	Rattus	rattus	NHMLAC	M	7421	331	180	34	25	1940	13.2056	6.04889	19.2217	37.2522	5.66778	14.5	21.1378	26.6456	7.02333	6.33444	12.4211
ANACAPA	Rattus	rattus	NHMLAC	M	7422	445	235	39	24	1940	17.1833	8.20889	22.45	46.19	6.58333	17.4367	27.7089	33.0722	9.25333	7.50778	14.2322
ANACAPA	Rattus	rattus	NHMLAC		7414	376	206	37	25	1940	13.7656	6.61667	19.9433	39.0344	5.67556	15.4744	22.3933	28.07	6.69444	6.38333	13.625
ANACAPA	Rattus	rattus	NHMLAC		7415	381	213	37	24	1940	14.1956	6.70667	18.8067	39.8256	5.68556	15.7	23.4567	27.8833	7.41	6.74222	13.6733
ANACAPA	Rattus	rattus	NHMLAC	F	85421	388	215	37	24	1975	16.6389	7.36444	21.3789	44.1244	5.99222	16.4667	26.2256	31.0133	8.14667	6.98667	13.8067
ANACAPA	Rattus	rattus	NHMLAC	F	85422	410	214	37	25	1975	16.6844	7.64109	22.6305	44.9522	6.43222	16.7589	26.5944	32.0789	8.06556	6.57667	14.4778
ANACAPA	Rattus	rattus	NHMLAC	M	85423	367	191	38	22	1975	14.3511	6.596		40.0244	5.61222	15.5389	23.1956	28.7	7.44556	6.49444	13.4256
ANACAPA	Rattus	rattus	NHMLAC	M	85424	360	195	37	27	1975	14.2922	6.91556	19.2656	39.8155	5.67778	15.6955	23.0278	28.7911	6.92222	6.81221	13.7933
ANACAPA	Rattus	rattus	NHMLAC	M	85425	453	222	39	25	1975	16.8811	7.69778	22.8539	45.7522	6.12444	17.0378	26.9067	32.4856	8.68	6.75667	14.5322
ANACAPA	Rattus	rattus	SBMNH	F	1492	295	158	32	20	1978	11.1044	5.82221		34.8056	5.46333				6.10777	6.35664
ANACAPA	Rattus	rattus	SBMNH	F	1494	336	177	35	24	1978	12.365	5.97776		36.7189	5.79222	14.9967	20.705	26.3578	6.6222	6.32555
ANACAPA	Rattus	rattus	SBMNH	F	1496	345	190	37	21	1978	14.8833	6.91556	19.875	40.7389	5.66333	16.9478	23.9444	28.5367		6.44444	13.9333
ANACAPA	Rattus	rattus	SBMNH	F	1498	344	190	38	22	1978	14.1267	6.47444	18.715	39.5278	5.72778	14.9022	22.5789	28.0256	6.86111	6.34778	13.9211
ANACAPA	Rattus	rattus	SBMNH	F	1499					1978	13.8978	6.49778	19.37	39.11	5.65	14.8	22.4011	27.8233	7.06444	6.35778	13.6078
ANACAPA	Rattus	rattus	SBMNH	M	1490	298	167	31	20	1978	12.01	6.01	17.2283	35.5667	5.71778	14.3778	20.0389	25.79	6.14667	6.43778	13.0989
ANACAPA	Rattus	rattus	SBMNH	M	1491	305	163	34	21	1978	12.3267	5.83333		33.2667	5.82		20.7556		6.24778	6.36333
ANACAPA	Rattus	rattus	SBMNH	M	1493	307	157	35	22	1978		6.14778			5.65333	16.4533		26.7644	6.51111	6.43667	14.0333
ANACAPA	Rattus	rattus	SBMNH	M	1495	375	202	35	22	1978		6.57111	20.575	40.0922	5.43556			29.1156	7.45889	6.16444
ANACAPA	Rattus	rattus	SBMNH	M	1500	330	176	33	21	1978	13.5267	6.17111	18.5933	37.8222	5.74	15.4422	21.9922	26.8244	6.62667	6.29667	13.5456
ANACAPA	Rattus	rattus	SBMNH	M	1893					1978	15.1978	6.89778	20.3883	41.7711	5.81889	16.1778	24.51	30.4911	7.58111	6.49	13.7489
ANACAPA	Rattus	rattus	SBMNH	M	1945	410	213	37	24	1978	16.1189	7.23444	21.5117	43.7356	6.15556	16.5933	25.7111	31.5556	8.32	6.42778	14.4067
ANACAPA	Rattus	rattus	SBMNH		1648(1)					1978					6.01222					6.19111
ANACAPA	Rattus	rattus	SBMNH		1648(2)					1978		6.78			5.98111	15.1733			7.42889	6.41333
ANACAPA	Rattus	rattus	SBMNH		1648(3)					1978	15.24	6.90444			6.31778		24.7044		7.70778	6.79667
ANACAPA	Rattus	rattus	SBMNH		1648(4)					1978					5.92333
ANACAPA	Rattus	rattus	SBMNH		1648(5)					1978		6.38222			5.77111				6.87333	6.31222
ANACAPA	Rattus	rattus	SBMNH		1648(6)					1978					6.02444					6.70889
ANACAPA	Rattus	rattus	SBMNH		1648(7)					1978	16.1944	7.34667			6.28333		25.7733		8.29111	6.6211
ANACAPA	Rattus	rattus	SBMNH		1648(8)					1978	14.6333	6.59667	19.9983	39.72	5.88889	16.5567	23.4822	28.4678	7.74111	6.67778
ANACAPA	Rattus	rattus	SBMNH		1918					1978	14.4844	6.72889	19.5017	40.9222	5.43	15.5744	23.9667	30.1267	7.49444	6.48222	14.18
ANACAPA	Rattus	rattus	SBMNH	F	1905	400	227.5	40	26	1979	16.0478	7.23444	21.465	43.4856	6.36333	16.5378	25.8267	30.8333	7.49667	6.83333	14.0078
ANACAPA	Rattus	rattus	SBMNH	F	1907	416	228	36	28	1979	17.2556	8.02	21.3367	45.6167	6.2	16.9833	26.4744	31.13	8.13	7.37778	15.4189
ANACAPA	Rattus	rattus	SBMNH	F	1913	345	186	33	24	1979	13.9	6.48222	19.5483	38.3	5.53444	15.4578	22.3256	27.27	6.90111	6.41556	13.7456
ANACAPA	Rattus	rattus	SBMNH	F	1942	380	197	36	27	1979	15.1722	7.08667	20.8883		6.15778	16.1122	24.9167		7.60556	6.77
ANACAPA	Rattus	rattus	SBMNH	F	1947	384	206	36	22	1979	15.86	7.00778			5.68		24.7978		7.60556	6.53667
ANACAPA	Rattus	rattus	SBMNH	M	1906	393	229	41	26	1979	16.5678	7.21111	21.7867	44.55	5.95667	16.8156	25.8578	31.9844	7.91444	6.71333	13.7744
ANACAPA	Rattus	rattus	SBMNH	M	1916	410	205	38	25	1979	17.6278	7.27	21.805	45.2144	5.72444	16.3778	26.9489	31.095	8.21444	6.70111	13.9367
ANACAPA	Rattus	rattus	SBMNH	M	1943	432	225	38	25	1979	18.0389	7.89667			6.30333		28.3578		8.17556	6.79
ANACAPA	Rattus	rattus	SBMNH	M	1944	432	232	39	26	1979	17.4278	7.95889	22.66		6.34444	17.0756	27.3444		8.51111	6.92889
ANACAPA	Rattus	rattus	SBMNH	M	2708	350	190	34	19	1986	14.54	6.53	19.8255	40.7378	5.68433	15.9377	23.51	29.1766	7.2711	6.88778	13.5811
ANACAPA	Rattus	rattus	SBMNH	M	2709	423	224	34	22	1986	17.7856	7.31111	22.0983	46.2322	6.17	17.1822	27.3933	32.9744	8.87833	6.81333	13.5911
ANACAPA	Rattus	rattus	OHC		FM1					2000	16.6822	7.42889	20.5217	43.3078	6.11778	15.9233	25.7044	30.6133	8.13333	6.56667	13.5367
ANACAPA	Rattus	rattus	OHC		FM2					2000	18.1689	8.52444	23.0783	47.8678	6.60556	18.0133	28.3	34.1967	8.53111	7.05444	15.0867
ANACAPA	Rattus	rattus	OHC		FM3					2000	17.7633	7.69	22.2533	46.4322	6.43222	16.4267	27.9733	33.1667	8.38111	7.05778	13.9167
ANACAPA	Rattus	rattus	OHC		FM4					2000	15.5678	7.04333	19.7967	41.3778	6.01889	16.0778	24.6044	29.4067	7.65222	6.77333	13.8122
ANACAPA	Rattus	rattus	OHC		FM5					2000	13.6956	6.36			5.69667		22.3167		7.01222	6.68667
ANACAPA	Rattus	rattus	OHC		FM6					2000	15.8533	6.94333	20.6783	42.2933	6.18111	16.1833	25.1556	30.2467	7.51889	6.64111	13.8211
ANACAPA	Rattus	rattus	OHC		FM7					2000	18.3456	8.03333	22.8867	47.6667	6.56	17.6422	28.0122	33.62	8.7	7.58	14.5333
ANACAPA	Rattus	rattus	OHC		FM8					2000	15.09	6.36667	20.0183	40.2244	5.78444	15.6056	23.7356	28.5233	7.55	6.67444	13.2289
ANACAPA	Rattus	rattus	OHC		FM9					2000		7.60333	21.05		6.66111	17.2656		31.2433	7.60333	6.84778	14.6167
ANACAPA	Rattus	rattus	OHC		FM10					2000	17.05	7.55444	21.5333	45.1989	6.41	16.6533	26.9067	31.3967	8.40111	6.72556	13.4067
